# Supplementary material for: Glycosylation of β1 subunit plays a pivotal role in the toxin sensitivity and activation of BK channels
Source: PubMed Central journal article supplement (PMC8183112; doi:10.1590/1678-9199-jvatitd-2020-0182), 2021-06-02
Supplement: 1678-9199-jvatitd-27-e20200182-s1.pdf [file 1678-9199-jvatitd-27-e20200182-s1.pdf]

## Supplementary Material to “Glycosylation of $\beta 1$ subunit plays a pivotal role in the toxin sensitivity and activation of BK channels”

**A**

(N80A)  
 Primer S1: 5' TGTGGGTCGCCGTGTCAGC 3'  
 Primer A1: 5' GGCATGGGTACTGGGGCAC 3'  
 (N142A)  
 Primer S2: 5' GCCGAAACCAGCGTCTATTCC 3'  
 Primer A2: 5' ACCCCGAGGTGCGGAGAAG 3'  
 (N80Q)  
 Primer S3: 5' TGTGGGTCCAGGTGTCAGC 3'  
 Primer A3: 5' GGCATGGGTACTGGGGCAC 3'  
 (N142Q)  
 Primer S4: 5' GCAGGAAACCAGCGTCCTATTC 3'  
 Primer A4: 5' CCTCTAGGTGCGGAGAAGCAGTAG 3'

**B**

```

1450 1460 1470 1480 1490 1500 1510 1520 1530
Beta1_subunit.seq AACTGAAAGGCAAGAAGTCCCCAGTACCCATGCTGTGGGTGAGTGTGAGTCCCGGAGGTGGGCTGTGCTGTACACAC
Beta1_N80A_N142A.seq AACTGAAAGGCAAGAAGTCCCCAGTACCCATGCTGTGGGTGAGTGTGAGTCCCGGAGGTGGGCTGTGCTGTACACAC
Consensus AACTGAAAGGCAAGAAGTCCCCAGTACCCATGCTGTGGGTGAGTGTGAGTCCCGGAGGTGGGCTGTGCTGTACACAC

1630 1640 1650 1660 1670 1680 1690 1700 1710
Beta1_subunit.seq AAATTCGAAGAGCAGCAGGTCCTTCTACTGCTTCTCCGACCTGGGGTGCAGAACAGGCTCTATTCCAGGCCCTACGGGGC
Beta1_N80A_N142A.seq AAATTCGAAGAGCAGCAGGTCCTTCTACTGCTTCTCCGACCTGGGGTGCAGAACAGGCTCTATTCCAGGCCCTACGGGGC
Consensus AAATTCGAAGAGCAGCAGGTCCTTCTACTGCTTCTCCGACCTGGGGTGCAGAACAGGCTCTATTCCAGGCCCTACGGGGC

1450 1460 1470 1480 1490 1500 1510 1520 1530
Beta1_subunit.seq AACTGAAAGGCAAGAAGTCCCCAGTACCCATGCTGTGGGTGAGTGTGAGTCCCGGAGGTGGGCTGTGCTGTACACAC
Beta1_N80Q_N142Q.seq AACTGAAAGGCAAGAAGTCCCCAGTACCCATGCTGTGGGTGAGTGTGAGTCCCGGAGGTGGGCTGTGCTGTACACAC
Consensus AACTGAAAGGCAAGAAGTCCCCAGTACCCATGCTGTGGGTGAGTGTGAGTCCCGGAGGTGGGCTGTGCTGTACACAC

1630 1640 1650 1660 1670 1680 1690 1700 1710
Beta1_subunit.seq AAATTCGAAGAGCAGCAGGTCCTTCTACTGCTTCTCCGACCTGGGGTGCAGAACAGGCTCTATTCCAGGCCCTACGGGGC
Beta1_N80Q_N142Q.seq AAATTCGAAGAGCAGCAGGTCCTTCTACTGCTTCTCCGACCTGGGGTGCAGAACAGGCTCTATTCCAGGCCCTACGGGGC
Consensus AAATTCGAAGAGCAGCAGGTCCTTCTACTGCTTCTCCGACCTGGGGTGCAGAACAGGCTCTATTCCAGGCCCTACGGGGC
    
```

**C**

```

61 70 80 90 100
Beta1 subunit RDQEEELKGGKVPQYPCLAVNVAAGRMAVLYHTEDTRDQNCQCSYIPGS
Beta1 N80A/N142A RDQEEELKGGKVPQYPCLAVNVAAGRMAVLYHTEDTRDQNCQCSYIPGS
Consensus RDQEEELKGGKVPQYPCLAVNVAAGRMAVLYHTEDTRDQNCQCSYIPGS

110 120 130 140 150
Beta1 subunit VDNVYQATARADVEKVRKRFQEQVYCFPSAPRGNETSVLFRQLYGPQALL
Beta1 N80A/N142A VDNVYQATARADVEKVRKRFQEQVYCFPSAPRGNETSVLFRQLYGPQALL
Consensus VDNVYQATARADVEKVRKRFQEQVYCFPSAPRGNETSVLFRQLYGPQALL

60 70 80 90 100
Beta1 subunit IRDQEEELKGGKVPQYPCLAVNVAAGRMAVLYHTEDTRDQNCQCSYIPGS
Beta1 N80Q/N142Q IRDQEEELKGGKVPQYPCLAVNVAAGRMAVLYHTEDTRDQNCQCSYIPGS
Consensus IRDQEEELKGGKVPQYPCLAVNVAAGRMAVLYHTEDTRDQNCQCSYIPGS

110 120 130 140 150
Beta1 subunit VDNVYQATARADVEKVRKRFQEQVYCFPSAPRGNETSVLFRQLYGPQALL
Beta1 N80Q/N142Q VDNVYQATARADVEKVRKRFQEQVYCFPSAPRGNETSVLFRQLYGPQALL
Consensus VDNVYQATARADVEKVRKRFQEQVYCFPSAPRGNETSVLFRQLYGPQALL
    
```

**D**

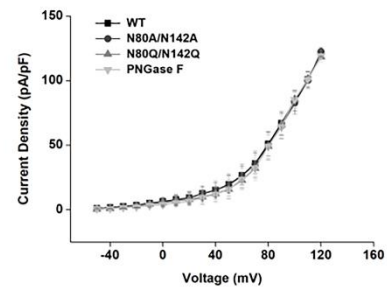

**Additional file 1.** The construction of N80A/N142A and N80Q/N142Q mutants of  $\beta 1$  subunit. **(A)** The complementary primer sequences were designed to construct N80A/N142A mutant and N80Q/N142Q mutant of  $\beta 1$  subunit. Primer 1 (S1, A1) and primer 2 (S2, A2) were used to construct N80A/N142A mutant, and primer 3 (S3, A3) and primer 4 (S4, A4) were used to construct N80Q/N142Q mutant. **(B)** Nucleic acid sequence alignment between wild-type, N80A/N142A and N80Q/N142Q mutants of  $\beta 1$  subunit. **(C)** Amino acid sequence alignment between wild-type, N80A/N142A and N80Q/N142Q mutants of  $\beta 1$  subunit. **(D)** Statistical analysis of current density of wild-type BK channels ( $\alpha + \beta 1$ ) ( $n = 8$ ) and N80A/N142A ( $n = 8$ , ns,  $p > 0.05$ ) or wild-type BK channels ( $\alpha + \beta 1$ ) ( $n = 8$ ) and N80Q/N142Q ( $n = 8$ , ns,  $p > 0.05$ ) or wild-type BK channels ( $\alpha + \beta 1$ ) ( $n = 8$ ) and BK ( $\alpha + \beta 1$ ) channels pretreated with PNGase F ( $n = 8$ , ns,  $p > 0.05$ ).
